# Supplementary material for: Functional mimicry of Ruffini receptors with fibre Bragg gratings and deep neural networks enables a bio-inspired large-area tactile-sensitive skin
Source: Springer Nature journal article supplement (doi:10.1038/s42256-022-00487-3), 2022-05-30
Supplement: 42256_2022_487_MOESM1_ESM.pdf [file 42256_2022_487_MOESM1_ESM.pdf]

---

**Supplementary information**

---

**Functional mimicry of Ruffini receptors with fibre Bragg gratings and deep neural networks enables a bio-inspired large-area tactile-sensitive skin**

---

In the format provided by the authors and unedited

# Functional mimicry of Ruffini receptors with fibre Bragg gratings and deep neural networks enables a bio-inspired large-area tactile-sensitive skin

Luca Massari<sup>1,2,3,8</sup>, Giulia Fransvea<sup>1,2,4,5,8</sup>, Jessica D'Abbraccio<sup>1,2</sup>, Mariangela Filosa<sup>1,2,3</sup>, Giuseppe Terruso<sup>1,2,3</sup>, Andrea Aliperta<sup>1,2,5</sup>, Giacomo D'Alesio<sup>1,2</sup>, Martina Zaltieri<sup>1,2,3,4,6</sup>, Emiliano Schena<sup>6</sup>, Eduardo Palermo<sup>4</sup>, Edoardo Sinibaldi<sup>7</sup>, Calogero Maria Oddo<sup>1,2</sup>.

<sup>1</sup>The BioRobotics Institute, Scuola Superiore Sant'Anna, Viale Rinaldo Piaggio 34, 56025 Pontedera, Italy

<sup>2</sup>Department of Excellence in Robotics & AI, Scuola Superiore Sant'Anna, Piazza Martiri della Libertà 33, 56127 Pisa, Italy

<sup>3</sup>Department of Linguistics and Comparative Cultural Studies, Ca' Foscari University of Venice, Dorsoduro 3246, 30123 Venezia, Italy

<sup>4</sup>Department of Mechanical and Aerospace Engineering, Sapienza University of Rome, Via Eudossiana 18, 00184 Roma, Italy

<sup>5</sup>ARTES 4.0 Competence Center on Advanced Robotics and enabling digital TEchnologies and Systems, Viale Rinaldo Piaggio 34, 56025 Pontedera, Italy

<sup>6</sup>Research Unit of Measurements and Biomedical Instrumentation, Department of Engineering, Università Campus Bio-Medico di Roma, Via Alvaro del Portillo 21, 00128 Roma, Italy

<sup>7</sup>Istituto Italiano di Tecnologia, Via Morego 30, 16163 Genoa, Italy

<sup>8</sup>These authors contributed equally: Luca Massari, Giulia Fransvea

Corresponding authors: [calogero.oddo@santannapisa.it](mailto:calogero.oddo@santannapisa.it) and [edoardo.sinibaldi@iit.it](mailto:edoardo.sinibaldi@iit.it)

## Supplementary Videos

*Supplementary Video 1 | Example experimental testing of artificial skin sensitivity with Von Frey hairs.*

*Supplementary Video 2 | Raw wavelength variations of FBG transducers due to pressure applied throughout the sensitive skin.*

*Supplementary Video 3 | Real-time force intensity and contact localization while indenting the skin in the test set with a mechatronic platform.*

*Supplementary Video 4 | Demonstration of skin ability to decode force intensity and contact location in real-time while touching the sensorized patch via the experimenter own finger.*

*Supplementary Video 5 | Demonstration of collaborative behaviours that could be implemented by a robot arm endowed with the developed sensitive skin while interacting with humans.*
